# Supplementary material for: Differentially Evolved Genes of Salmonella Pathogenicity Islands: Insights into the Mechanism of Host Specificity in Salmonella
Source: PLoS One. 2008 Dec 3;3(12):e3829. doi: 10.1371/journal.pone.0003829 (PMC2585142; doi:10.1371/journal.pone.0003829)
Supplement: Table S2 — Synonymous distance values of SPI-2 genes for all serovar combinations (0.02 MB XLS) [file pone.0003829.s002.xls]

## Sheet: Sheet1
Table S2. DN values of SPI-2 genes
	ssaC	ssaD	ssaE	ssaH	ssaI	ssaJ	ssaK	ssaM	ssaN	ssaO	ssaP	ssaQ	ssaR	ssaS	ssaT	ssaU	ssaV	sscA	sseB	sseC	sseD	sseE	sseF	sseG	ssrA	ssrB	stm1410	ttrA	orf242	orf48	orf319	ssaG	sscB	sseA	ttrC	ttrR	ttrS	sifA	ssaB
S. Typhi - S. Paratyphi	0.0009	0.0054	0.0053	0.0058	0.0266	0.0034	0.0077	0.0142	0.0052	0.0068	0.0035	0.0068	0.0021	0.005	0.0067	0	0.0026	0	0.0054	0.0018	0	0	0.005	0.0038	0.0071	0.002	0.0048	0.0044	0.0028	0.003	0.0014	0	0	0	0.0132	0	0.0031	0.0166	0.0035
S. Typhimurium - S. Choleraesuis	0.0035	0.0021	0.0107	0	0.0158	0.0052	0.0077	0.0142	0.0041	0	0.0035	0.0041	0	0	0.0034	0.0037	0.0013	0.0028	0.0142	0.021	0.0184	0	0.0218	0.0038	0.0033	0.002	0.0024	0.0022	0.0111	0	0.0028	0	0	0.0039	0.0044	0	0.0008	0.0013	0.0035
S. Typhimurium - S. Enteritidis	0.0018	0.0022	0	0	0	0.0034	0.0019	0	0.001	0.0034	0	0.0082	0.0021	0	0.005	0.0025	0	0.0028	0	0.0044	0	0	0.0069	0.0019	0.0028	0	0	0.0017	0.0093	0	0.0042	0	0	0.0039	0.0044	0	0.0038	0.0025	0.0069
S. Choleraesuis - S. Enteritidis	0.0035	0.0043	0.0107	0	0.0158	0.0052	0.0096	0.0142	0.0031	0.0034	0.0035	0.0068	0.0021	0	0.005	0.0012	0.0013	0.0055	0.0142	0.0165	0.0184	0	0.0183	0.0019	0.0014	0.002	0.0024	0.0013	0.0093	0	0.0042	0	0	0	0.0029	0	0.0046	0.0038	0.0104
S. Typhimurium - S. Typhi	0.0026	0.0021	0.0053	0.0058	0.0266	0.0052	0.0057	0.0035	0.0031	0.0068	0	0.0054	0.0021	0.005	0.0067	0.0012	0.0032	0.0083	0	0.0238	0.0068	0.0032	0.0174	0.0077	0.0076	0	0.0048	0.0013	0.0055	0.004	0.0014	0	0.003	0.0039	0.0073	0	0.0023	0.0295	0
S. Typhimurium - S. Paratyphi	0.0018	0.0054	0.0107	0	0	0.0034	0.0057	0.0106	0.0021	0	0.0035	0.0068	0	0	0.0101	0.0012	0.0019	0.0083	0.0054	0.0219	0.0068	0.0032	0.0121	0.0038	0.0047	0.002	0	0.003	0.0074	0.003	0.0028	0	0.003	0.0039	0.0117	0	0.0038	0.0282	0.0035
S. Choleraesuis - S. Typhi	0.0009	0	0.0054	0.0058	0.0429	0.0034	0.0096	0.0177	0.0052	0.0068	0.0035	0.0041	0.0021	0.005	0.0067	0.0025	0.0019	0.0055	0.0142	0.0277	0.0254	0.0032	0.0254	0.0077	0.0057	0.002	0.0072	0.0035	0.0055	0.004	0.0042	0	0.003	0	0.0058	0	0.0031	0.0308	0.0035
S. Choleraesuis - S. Paratyphi	0.0018	0.0054	0.0107	0	0.0158	0.0052	0.0135	0.0035	0.0041	0	0	0.0054	0	0	0.0101	0.0025	0.0006	0.0055	0.0087	0.0259	0.0254	0.0032	0.0236	0.0038	0.0033	0	0.0024	0.0052	0.0074	0.003	0.0056	0	0.003	0	0.0102	0	0.0046	0.0295	0.0069
S. Typhi - S. Enteritidis	0.0026	0.0043	0.0053	0.0058	0.0266	0.0034	0.0038	0.0035	0.0021	0.0102	0	0.0081	0.0041	0.005	0.0084	0.0012	0.0032	0.0055	0	0.0283	0.0068	0.0032	0.0209	0.0058	0.0062	0	0.0048	0.003	0.0037	0.004	0.0056	0	0.003	0	0.0058	0	0.0046	0.0321	0.0069
S. Paratyphi - S. Enteritidis	0.0018	0.0054	0.0107	0	0	0	0.0038	0.0106	0.0031	0.0034	0.0035	0.0041	0.0021	0	0.0051	0.0012	0.0019	0.0055	0.0054	0.0265	0.0068	0.0032	0.0156	0.0019	0.0038	0.002	0	0.0048	0.0055	0.003	0.007	0	0.003	0	0.0102	0	0.0061	0.0308	0.0034
