# Supplementary material for: Differentially Evolved Genes of Salmonella Pathogenicity Islands: Insights into the Mechanism of Host Specificity in Salmonella
Source: PLoS One. 2008 Dec 3;3(12):e3829. doi: 10.1371/journal.pone.0003829 (PMC2585142; doi:10.1371/journal.pone.0003829)
Supplement: Table S4 — Synonymous distance values of SPI-4 genes for all serovar combinations (0.01 MB XLS) [file pone.0003829.s004.xls]

## Sheet: Sheet1
Table S4. DN values of SPI-4 genes
	STM 4257	STM 4258	STM 4259	STM 4260	STM 4262
S. Typhi - S. Paratyphi	0.004	0.0094	0.0029	0.001	0.0012
S. Typhimurium - S. Choleraesuis	0.0101	0.0056	0	0	0.0019
S. Typhimurium - S. Enteritidis	0.0122	0.0094	0	0	0
S. Choleraesuis - S. Enteritidis	0.002	0.0094	0	0	0.0019
S. Typhimurium - S. Typhi	0.0122	0.0113	0.0039	0.001	0.0031
S. Typhimurium - S. Paratyphi	0.0122	0.0037	0.001	0	0.0031
S. Choleraesuis - S. Typhi	0.002	0.0094	0.0039	0.001	0.0012
S. Choleraesuis - S. Paratyphi	0.0061	0.0037	0.001	0	0.0012
S. Typhi - S. Enteritidis	0.004	0.0019	0.0039	0.001	0.0031
S. Paratyphi - S. Enteritidis	0.0081	0.0094	0.001	0	0.0031
